# Supplementary material for: A theoretical study of hydrogen bonding, proton transfer and kinetic isotope effects in the dimers of 2-tetrahydropyranol and in the 2-tetrahydropyranolâ€“H2O adductsElectronic Supplementary Information available. See http://www.rsc.org/suppdata/cp/b1/b104613f/
Source: Royal Society of Chemistry journal article supplement (doi:10.1039/b104613f), 2001-01-01
Supplement: table_s1.doc [file table_s1.doc]

| **Table S1** Selected interatomic distances (Å) calculated for the structures reported in Table 1. | | | | | | | |
| --- | --- | --- | --- | --- | --- | --- | --- |
|  |  |  |  |  |  |  |  |
| structure**a** | | r(1-2) | r(7-8) | r(8-9) | r(9-10) | r(15-16) | r(1-16) |
|  |  |  |  |  |  |  |  |
| **1a** | (-) | 1.454 | 0.980 | 1.829 | 1.454 | 0.980 | 1.829 |
| **1b** | TS | 1.818 | 1.311 | 1.120 | 1.818 | 1.312 | 1.120 |
| **1c** | (-) | 2.523 | 1.802 | 0.981 | 2.523 | 1.802 | 0.981 |
| **2a** | (-) | 1.447 | 0.982 | 1.828 | 1.447 | 0.982 | 1.828 |
| **2b** | TS | 1.780 | 1.320 | 1.118 | 1.780 | 1.321 | 1.117 |
| **2c** | (-) | 2.521 | 1.812 | 0.981 | 2.521 | 1.812 | 0.981 |
| **3a** | (-) | 1.455 | 0.982 | 1.786 | 1.449 | 0.982 | 1.820 |
| **3b** | TS | 1.835 | 1.325 | 1.110 | 1.793 | 1.309 | 1.121 |
| **3c** | (-) | 2.515 | 1.811 | 0.981 | 2.498 | 1.786 | 0.981 |
| **4a** | (-) | 1.456 | 0.982 | 1.780 | 1.456 | 0.982 | 1.780 |
| **4b** | TS | 1.820 | 1.312 | 1.118 | 1.822 | 1.312 | 1.118 |
| **4c** | (-) | 2.519 | 1.782 | 0.983 | 2.519 | 1.781 | 0.983 |
| **5a** | (-) | 1.447 | 0.982 | 1.813 | 1.447 | 0.982 | 1.812 |
| **5b** | TS | 1.805 | 1.328 | 1.111 | 1.805 | 1.327 | 1.111 |
| **5c** | (-) | 2.508 | 1.819 | 0.980 | 2.508 | 1.819 | 0.980 |
| **6a** | (-) | 1.447 | 0.979 | 1.840 | 1.453 | 0.982 | 1.820 |
| **6b** | TS | 1.785 | 1.307 | 1.123 | 1.829 | 1.329 | 1.110 |
| **6c** | (-) | 2.522 | 1.802 | 0.981 | 2.510 | 1.808 | 0.982 |
|  |  |  |  |  |  |  |  |
|  |  | r(1-2) | r(7-8) | r(8-15) | r(9-10) | r(9-16) | r(1-16) |
|  |  |  |  |  |  |  |  |
| **7a** | (-) | 1.457 | 0.984 | 1.784 | 2.497 | 0.981 | 1.780 |
| **7b** | TS | 1.664 | 1.204 | 1.205 | 1.664 | 1.211 | 1.210 |
| **8a** | (-) | 1.450 | 0.979 | 1.812 | 2.503 | 0.978 | 1.833 |
| **8b** | TS | 1.659 | 1.217 | 1.196 | 1.627 | 1.194 | 1.220 |
| **8c** | (-) | 2.492 | 1.834 | 0.981 | 1.448 | 1.794 | 0.981 |
| **9a** | (-) | 1.449 | 0.982 | 1.794 | 2.496 | 0.981 | 1.802 |
| **9b** | TS | 1.642 | 1.208 | 1.207 | 1.642 | 1.210 | 1.210 |
|  |  |  |  |  |  |  |  |
| H2O-catalysed reaction | | | | | | | |
|  |  |  |  |  |  |  |  |
|  |  | r(1-2) | r(2-7) | r(7-17) | r(17-19) | r18-19 | r(1-18) |
|  |  |  |  |  |  |  |  |
| **10a** | (-H2O) | 1.452 | 1.380 | 0.980 | 1.903 | 0.977 | 1.926 |
| **10b** | TS | 1.755 | 1.287 | 1.287 | 1.159 | 1.254 | 1.177 |
| **10c** | (-H2O) | 2.541 | 1.220 | 1.917 | 0.979 | 1.868 | 0.980 |
| **11a** | (-H2O) | 1.447 | 1.396 | 0.979 | 1.926 | 0.978 | 1.941 |
| **11b** | TS | 1.762 | 2.297 | 1.256 | 1.183 | 1.262 | 1.177 |
| **11c** | (-H2O) | 2.551 | 1.223 | 1.887 | 0.978 | 1.857 | 0.980 |
| **a** See Table 1 | | | | | | | |
